# Supplementary material for: Photoinduced interactions of two dirhodium complexes with d(GTCGAC)2 probed by 2D NOESY
Source: Royal Society of Chemistry journal article supplement (doi:10.1039/c4dt03119a), 2015-01-01
Supplement: c4dt03119a1.pdf [file c4dt03119a1.pdf]

*Supporting Information*

**Photoinduced interactions of two dirhodium complexes with  
 $d(\text{GTCGAC})_2$  probed by 2D NOESY**

Alycia M. Palmer, Jessica D. Knoll, Claudia Turro\*

Department of Chemistry and Biochemistry, The Ohio State University, Columbus, OH 43210

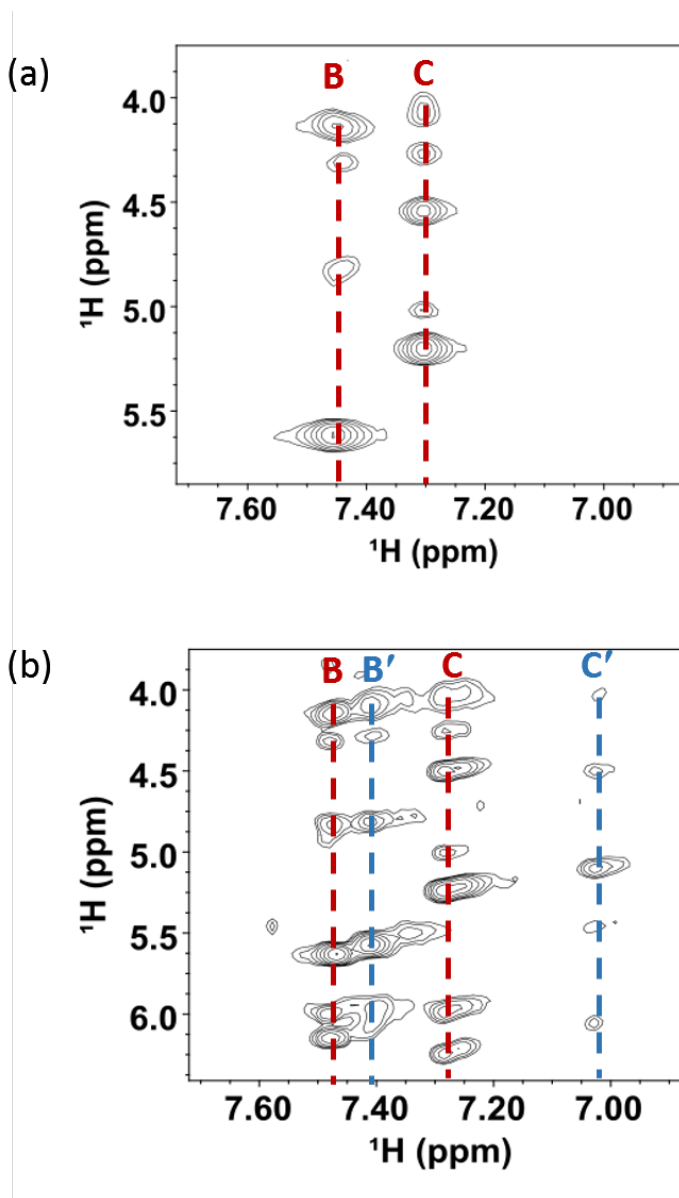

**Figure S1.** NOESY spectra of  $d(\text{GTCGAC})_2$  with  $\text{Rh}_2\text{dppz}$  (a) in the dark and (b) after irradiation ( $\lambda > 395$  nm).

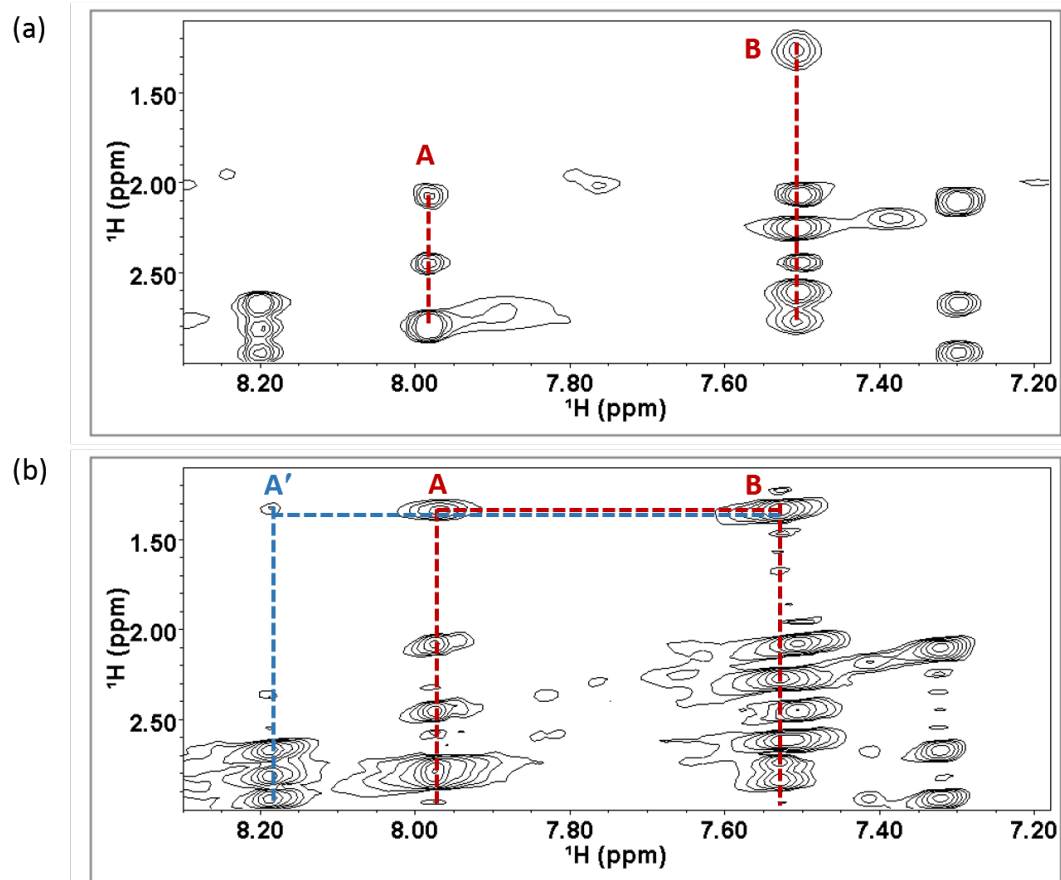

**Figure S2.** NOESY spectra of d(GTCGAC)<sub>2</sub> with Rh<sub>2</sub>bpy (a) in the dark and (b) after irradiation ( $\lambda > 395$  nm).

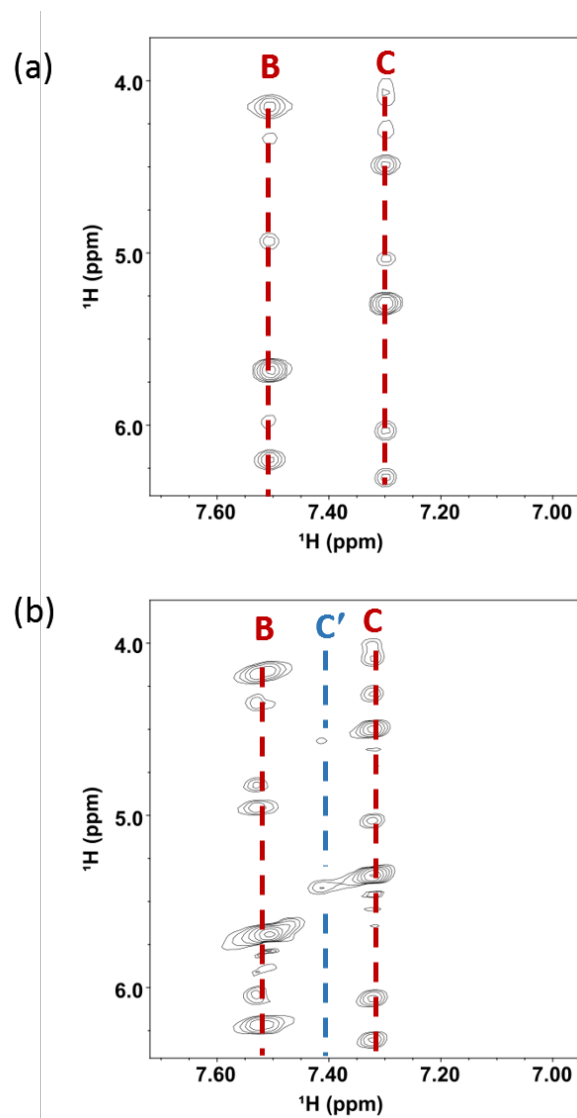

**Figure S3.** NOESY spectra of d(GTCGAC)<sub>2</sub> with Rh<sub>2</sub>bpy (a) in the dark and (b) after irradiation ( $\lambda > 395$  nm).
